# Supplementary material for: Protection from Endotoxin Shock by Selective Targeting of Proinflammatory Signaling to the Nucleus Mediated by Importin Alpha 5
Source: PubMed Central journal article supplement (PMC6768080; doi:10.4049/immunohorizons.1900064), 2019-09-18
Supplement: NIHMS1051329-supplement-Suppl_Inf_.pdf [file NIHMS1051329-supplement-Suppl_Inf_.pdf]

## Supplemental Materials.

### Supplemental Figure 1

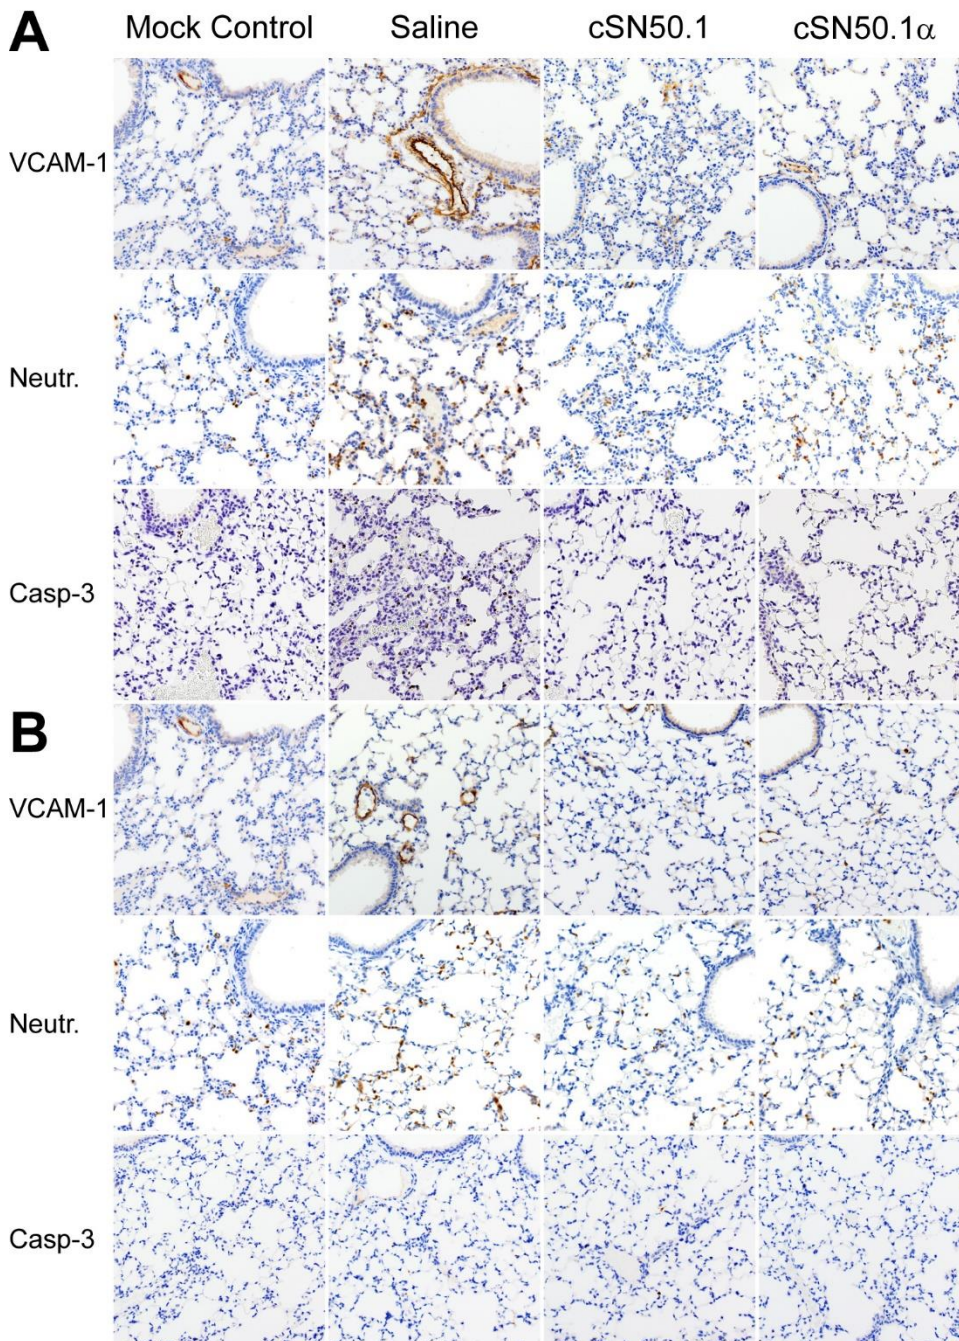

**Supplemental Fig. 1. Importin  $\alpha$ 5-selective NTM suppresses lung endothelial injury (VCAM-1), decreases circulating neutrophils, and prevents apoptosis (Casp-3) in mice comprising 2 models of Endotoxin Shock: High Dose LPS model (A) and Low Dose LPS model primed with D-galactosamine (B).**

Representative images (40x magnification) of lung sections in unchallenged mice (mock control) or mice challenged with LPS (**A**: 35 mg/kg LPS; **B**: 1 g/kg D-Gal then 50  $\mu$ g/kg LPS). Mice were treated with either 7 (A) or 5 (B) doses of NTM (33 mg/kg) or saline (See text for details). Data presented in this figure denotes 2 independent in vivo experiments completed with 5 mice per condition group.

## Supplemental Figure. 2

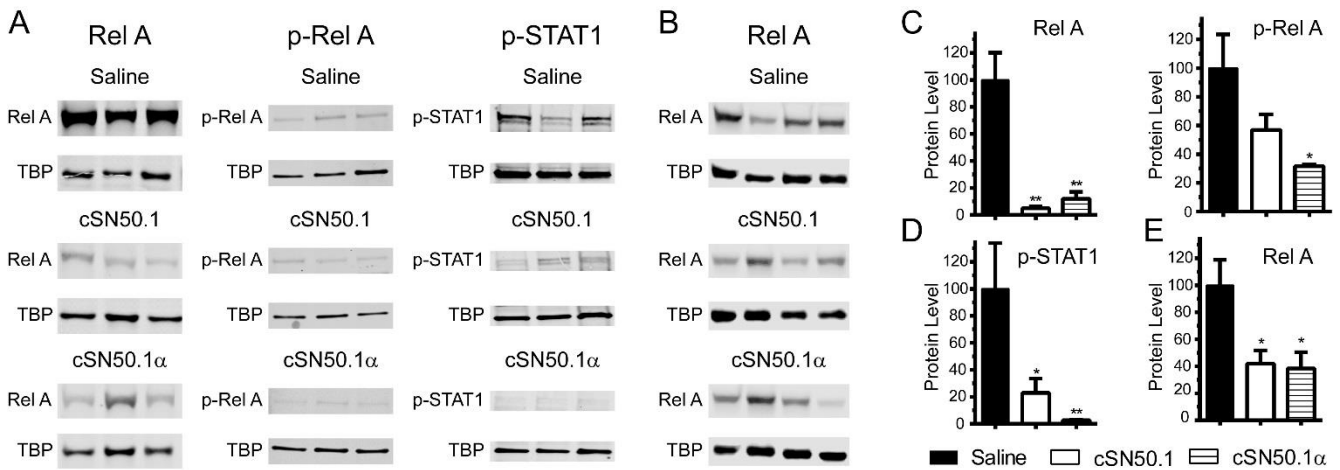

**Supplemental Fig. 2. Importin  $\alpha$ 5-selective NTM reduces nuclear translocation of NF- $\kappa$ B p65 (Rel A), phospho-NF- $\kappa$ B p65 (p-Rel A) and phospho-STAT1 ( $\alpha$  and  $\beta$ ) in two models of Endotoxin Shock. A. and B. Representative immunoblots of liver nuclear extracts. Liver samples were collected 12 hr after mice were challenged with a High Dose LPS (A) or 6 hr after mice primed with D-Gal were challenged with a Low Dose LPS (B). Mice were treated with either 7 (A) or 5 (B) doses of NTM (33 mg/kg) or saline. C. and D. Quantitative representation of immunoblots shown in panel A. E. Quantitative representation of immunoblots shown in panel B. Data presented in this figure denotes 2 independent *in vivo* experiments completed with 5 mice per condition group. All signals were normalized to TATA Binding Protein (TBP) and expressed as percent inhibition  $\pm$  SEM. Significance was determined by one-way ANOVA, \* -  $p < 0.05$ , \*\* -  $p < 0.005$ .**
